# Supplementary material for: Full Optoelectronic Simulation of Lead-Free Perovskite/Organic Tandem Solar Cells
Source: MDPI journal article supplement (doi:10.3390/polym15030784), 2023-02-03
Supplement: s1 [file s1]

# Supplementary Materials

## Full Optoelectronic Simulation of lead-free Perovskite/Organic Tandem Solar cells

Marwa S. Salem, Ahmed Shaker, M. Abouelatta and Ahmed Saeed

### ELECTRICAL MATERIAL PARAMETERS

**Table S1.** Single junction PSC parameters [S1, S2, S3]

|                                           | ITO | PEDOT:PSS          | Lead-free Perovskite* | C60                  | Ag  |
|-------------------------------------------|-----|--------------------|-----------------------|----------------------|-----|
| Thickness (nm)                            | 150 | 31                 | 212                   | 25                   | 130 |
| HOMO (eV)                                 |     | 4.9                | 5.68                  | 5.9                  |     |
| LUMO (eV)                                 |     | 3.6                | 4.06                  | 4.2                  |     |
| $\epsilon_r$                              |     | 3.5                | 7                     | 5                    |     |
| $N_c$ (cm <sup>-3</sup> )                 |     | 10 <sup>21</sup>   | 2×10 <sup>18</sup>    | 2.2×10 <sup>18</sup> |     |
| $N_v$ (cm <sup>-3</sup> )                 |     | 10 <sup>21</sup>   | 2×10 <sup>18</sup>    | 1.8×10 <sup>19</sup> |     |
| $N_A$ (cm <sup>-3</sup> )                 |     | 10 <sup>18</sup>   |                       |                      |     |
| $N_D$ (cm <sup>-3</sup> )                 |     |                    |                       | 2×10 <sup>18</sup>   |     |
| $\mu_n$ (cm <sup>2</sup> /Vs)             |     | 8×10 <sup>-5</sup> | 0.01                  | 0.08                 |     |
| $\mu_p$ (cm <sup>2</sup> /Vs)             |     | 8×10 <sup>-5</sup> | 0.01                  | 0.0035               |     |
| $N_t$ (cm <sup>-3</sup> )                 |     |                    | 10 <sup>13</sup>      |                      |     |
| $E_t$ (eV)                                |     |                    | 0.9                   |                      |     |
| $C_n$ (cm <sup>-3</sup> s <sup>-1</sup> ) |     |                    | 10 <sup>-10</sup>     |                      |     |
| $C_p$ (cm <sup>-3</sup> s <sup>-1</sup> ) |     |                    | 10 <sup>-10</sup>     |                      |     |
| Work function (eV)                        | 4.3 |                    |                       |                      | 4.3 |

\* The lead-free perovskite is GA<sub>0.06</sub>(FA<sub>0.8</sub>CS<sub>0.2</sub>)<sub>0.94</sub>SnI<sub>2</sub>Br. At A site, a bigger organic cation, guanidinium (GA+) is used in addition to formamidinium (FA), and cesium (Cs) cations. At the B-site, bivalent cation tin (Sn) is placed. X is a combination of monovalent halide anions I and Br. (Remark: the perovskite material structure is generally denoted by ABX<sub>3</sub> where A is a monovalent cation, B is a divalent cation, and X is a halide anion.)

**Table S2.** Single junction OSC parameters [S1, S4]

|                                           | ITO | PEDOT:PSS          | DPPEZnP-TBO: PC61BM | PFN              | Al  |
|-------------------------------------------|-----|--------------------|---------------------|------------------|-----|
| Thickness (nm)                            | 116 | 15                 | 117.5               | 5                | 70  |
| HOMO (eV)                                 |     | 4.9                | 5.23                | 7                |     |
| LUMO (eV)                                 |     | 3.6                | 3.9                 | 3.9              |     |
| $\epsilon_r$                              |     | 3.5                | 3.5                 | 3.5              |     |
| $N_c$ (cm <sup>-3</sup> )                 |     | 10 <sup>21</sup>   | 10 <sup>21</sup>    | 10 <sup>21</sup> |     |
| $N_v$ (cm <sup>-3</sup> )                 |     | 10 <sup>21</sup>   | 10 <sup>21</sup>    | 10 <sup>21</sup> |     |
| $N_A$ (cm <sup>-3</sup> )                 |     | 10 <sup>18</sup>   |                     |                  |     |
| $N_D$ (cm <sup>-3</sup> )                 |     |                    |                     |                  |     |
| $\mu_n$ (cm <sup>2</sup> /Vs)             |     | 8×10 <sup>-5</sup> | 5×10 <sup>-4</sup>  | 10 <sup>-4</sup> |     |
| $\mu_p$ (cm <sup>2</sup> /Vs)             |     | 8×10 <sup>-5</sup> | 5×10 <sup>-4</sup>  | 10 <sup>-6</sup> |     |
| $N_t$ (cm <sup>-3</sup> )                 |     |                    | 2×10 <sup>14</sup>  |                  |     |
| $E_t$ (eV)                                |     |                    | 0.5                 |                  |     |
| $C_n$ (cm <sup>-3</sup> s <sup>-1</sup> ) |     |                    | 10 <sup>-10</sup>   |                  |     |
| $C_p$ (cm <sup>-3</sup> s <sup>-1</sup> ) |     |                    | 10 <sup>-10</sup>   |                  |     |
| Work function (eV)                        | 4.4 |                    |                     |                  | 4.1 |

## OPTICAL MATERIAL DATA

**Table S3.** The references used in obtaining the refractive index  $n$  and extinction coefficient  $k$  of the various materials of the tandem layers

| Subcell | Layer                                     | REF                                                                                         |
|---------|-------------------------------------------|---------------------------------------------------------------------------------------------|
| PSC     | ITO                                       | Setfos material database (from Woollam VASE)                                                |
|         | PEDOT:PSS                                 | Setfos material database (from www.hcstarck.com)                                            |
|         | ASnI <sub>2</sub> Br lead-free perovskite | [S3]                                                                                        |
|         | C60                                       | Setfos material database (Measured by Thomas Stuebinger at the University of Bayreuth [S5]) |
| OSC     | PEDOT:PSS                                 | Setfos material database (from www.hcstarck.com)                                            |
|         | DPPEZnP-TBO:PC61BM                        | [S6]                                                                                        |
|         | PFN                                       | [S7]                                                                                        |
|         | Al                                        | Setfos material database (from Woollam)                                                     |

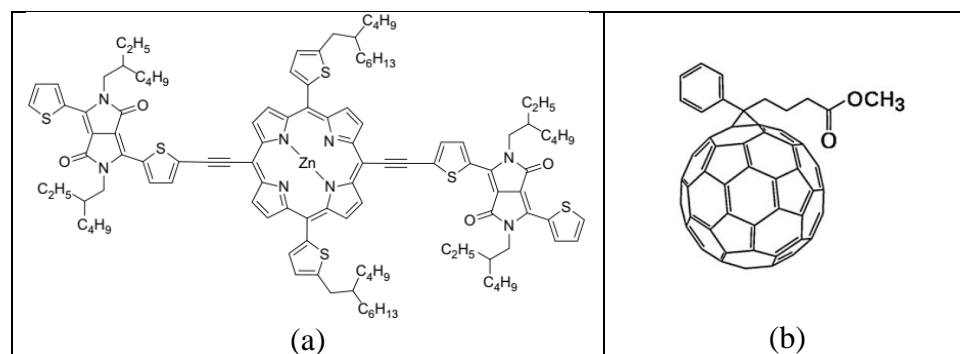

Figure S1 Molecular structures of (a) DPPEZnP-TBO, (b) fullerene PC<sub>61</sub>BM.

## References

- [S1] Coropceanu, V.; Cornil, J. Analysis and optimization of organic tandem solar cells by full opto-electronic simulation. *Frontiers in Photonics* **2022**, *3*, 16.
- [S2] Qirong, Z.; Bao, Z.; Yongmao, H.; Liang, L.; Zhuoqi, D.; Zaixin, X.; Xiaobo, Y. A study on numerical simulation optimization of perovskite solar cell based on CuI and C60. *Materials Research Express* **2022**, *9*(3), 036401, DOI 10.1088/2053-1591/ac5a34.
- [S3] Chen, M.; Kapil, G.; Li, Y.; Kamarudin, M. A.; Baranwal, A. K.; Nishimura, K.; Hayase, S. Large synergy effects of doping, a site substitution, and surface passivation in wide bandgap Pb-free ASnI<sub>2</sub>Br perovskite solar cells on efficiency and stability enhancement. *Journal of Power Sources* **2022**, *520*, 230848, <https://doi.org/10.1016/j.jpowsour.2021.230848>.
- [S4] C. Li, M.; Gao, K.; Wan, X.; Zhang, Q.; Kan, B.; Xia, R.; Chen, Y. Solution-processed organic tandem solar cells with power conversion efficiencies > 12%. *Nature Photonics* **2017**, *11*(2), 85-90, DOI: 10.1038/NPHOTON.2016.240.

[S5] Stübinger, T. Optische modellierung und charakterisierung von organischen donor-akzeptor solarzellen. *Perspektivenverl.* Ph.D. Thesis, **2005**.

[S6] Xiao, L.; Liang, T.; Gao, K.; Lai, T.; Chen, X.; Liu, F.; Cao, Y. Ternary solar cells based on two small molecule donors with same conjugated backbone: the role of good miscibility and hole relay process. *ACS Applied Materials & Interfaces* **2017**, 9(35), 29917-29923, <https://doi.org/10.1021/acsami.7b07960>

[S7] He, Z.; Zhong, C.; Su, S.; Xu, M.; Wu, H.; Cao, Y. Enhanced power-conversion efficiency in polymer solar cells using an inverted device structure. *Nat. Photonics* **2012**, 6, 591–595, doi:10.1038/nphoton.2012.190.
